# Supplementary material for: Notch1 hallmarks fibrillary depositions in sporadic Alzheimer’s disease
Source: PubMed Central journal article supplement (PMC4929714; doi:10.1186/s40478-016-0327-2), 2016-07-01

3VV[f[a`S^X\W#, 8Ygd\#

A

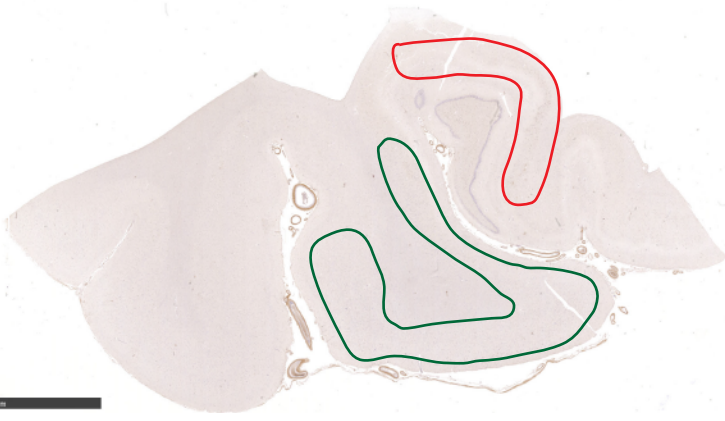

D

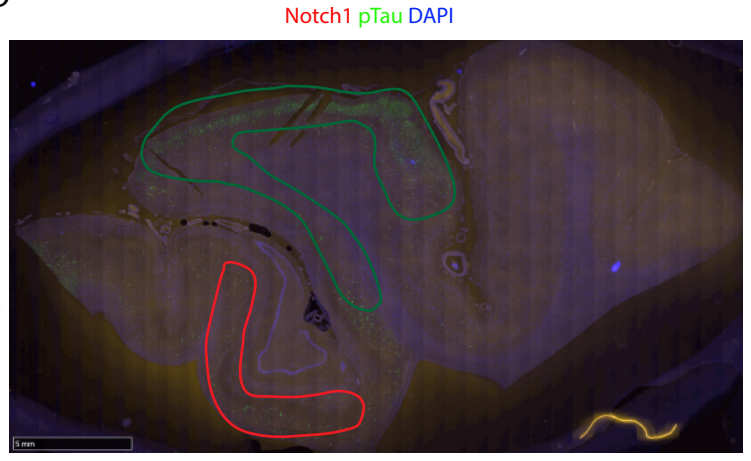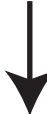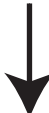

B

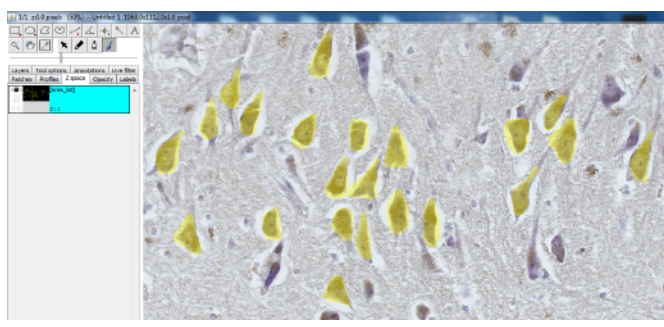

E

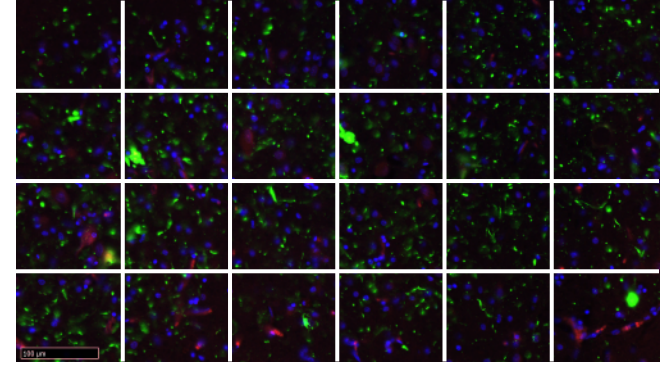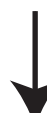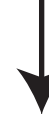

B'

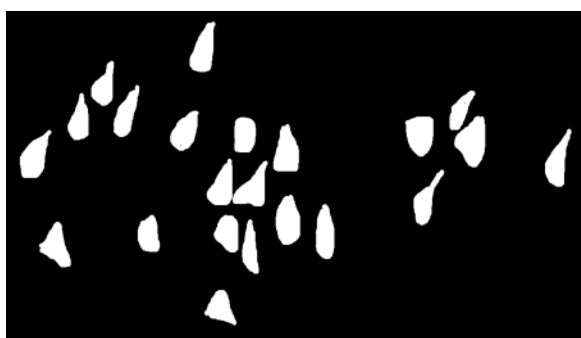

E'

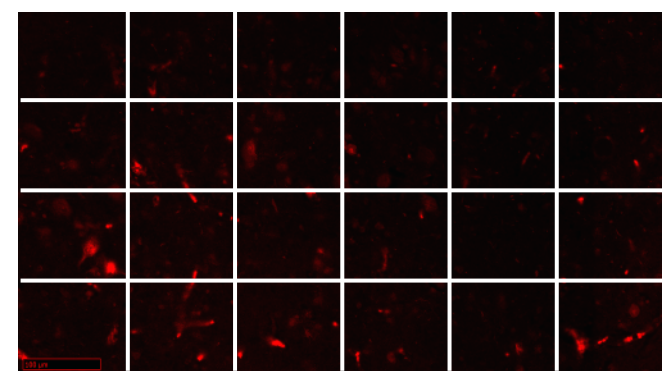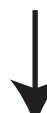

C

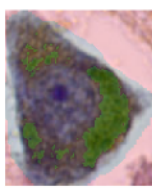

C'

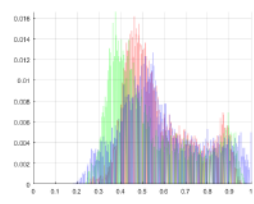

E''

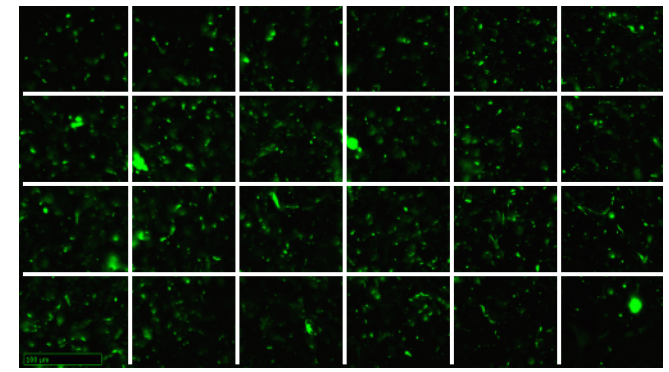

Supplement: 40478_2016_327_MOESM1_ESM.pdf [file 40478_2016_327_MOESM1_ESM.pdf]
