# Supplementary material for: Notch1 hallmarks fibrillary depositions in sporadic Alzheimer’s disease
Source: PubMed Central journal article supplement (PMC4929714; doi:10.1186/s40478-016-0327-2), 2016-07-01

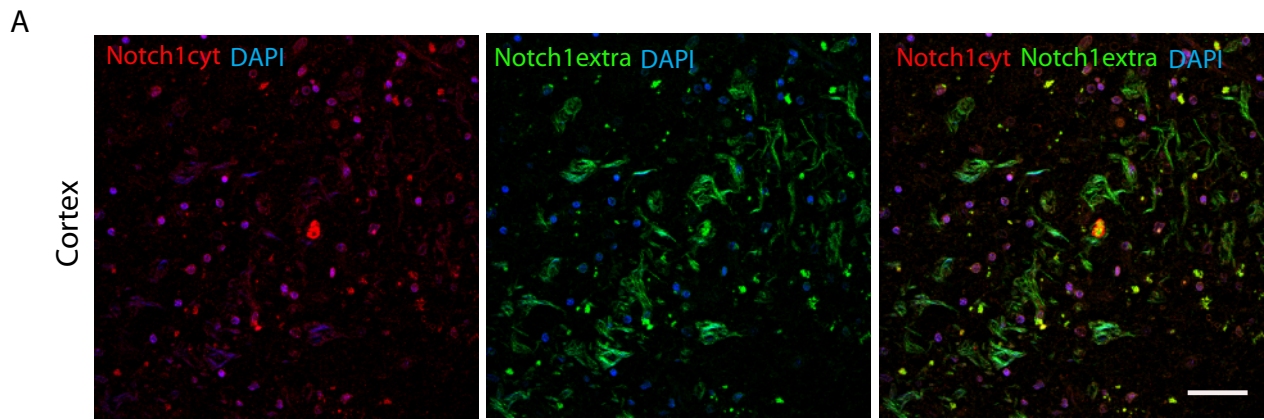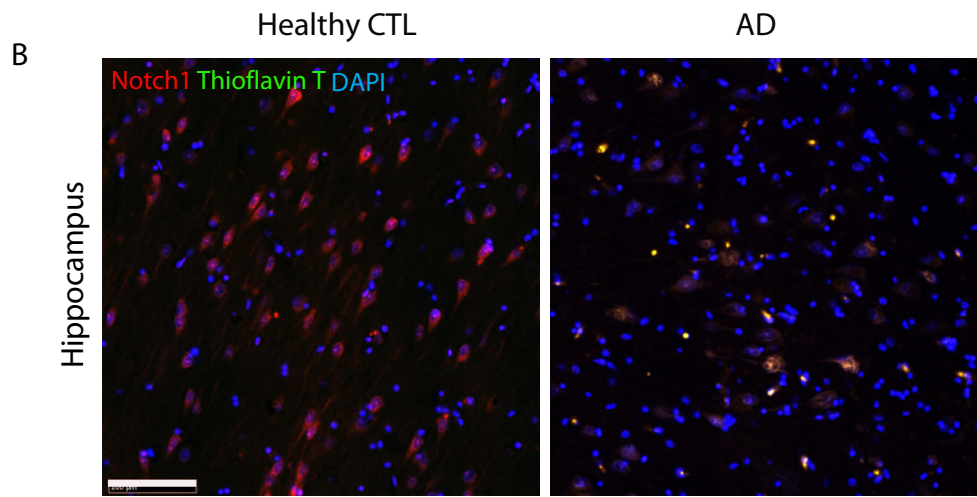

Supplement: 40478_2016_327_MOESM4_ESM.pdf [file 40478_2016_327_MOESM4_ESM.pdf]
